# Supplementary material for: Mosquitocidal Activity of the Methanolic Extract of Annickia chlorantha and Its Isolated Compounds against Culex pipiens, and Their Impact on the Non-Target Organism Zebrafish, Danio rerio
Source: MDPI journal article supplement (doi:10.3390/insects13080676), 2022-07-27
Supplement: s1 [file s1]

**Table S1:** Larvicidal activity of palmatine fraction against the mosquito vector, *Culex pipiens*.

| Concentrations<br>(µg/ml) | <i>n</i> | Larval mortality<br>% ± SE | Regression<br>equation | LC <sub>50</sub><br>(LCL–UCL)<br>(µg/ml) | LC <sub>90</sub><br>(LCL–UCL)<br>(µg/ml) | Statistic summary                                          |
|---------------------------|----------|----------------------------|------------------------|------------------------------------------|------------------------------------------|------------------------------------------------------------|
| Control                   | 75       | 0.0 ± 0.0a                 | $Y = 1.3293X - 5.1626$ | 33.392<br>(27.366 – 40.343)              | 81.522<br>(63.405 – 122.239)             | <i>d. f.</i> = 5,<br><i>P</i> < 0.001,<br>$\chi^2$ = 7.121 |
| 10                        | 75       | 9.33 ± 1.33b               |                        |                                          |                                          |                                                            |
| 20                        | 75       | 21.33 ± 1.33c              |                        |                                          |                                          |                                                            |
| 40                        | 75       | 42.67 ± 1.33d              |                        |                                          |                                          |                                                            |
| 60                        | 75       | 81.33 ± 2.67e              |                        |                                          |                                          |                                                            |
| 80                        | 75       | 98.67 ± 1.33f              |                        |                                          |                                          |                                                            |

Larval mortalities are presented as Mean±SE of three replicates. Means with different letters are significantly different at (*P* < 0.05). (LC<sub>50</sub>) concentration that kills 50% of population, (LC<sub>90</sub>) concentration that kills 90% of population, (LCL) lower confidence limit, (UCL) upper confidence limit, (DF) degree of freedom, ( $\chi^2$ ) Chi-square, *n* = sample size.

**Table S2:** Larvicidal activity of jatrorrhizine fraction against the mosquito vector, *Culex pipiens*.

| Concentrations<br>(µg/ml) | <i>n</i> | Larval mortality<br>% ± SE | Regression<br>equation | LC <sub>50</sub><br>(LCL–UCL)<br>(µg/ml) | LC <sub>90</sub><br>(LCL–UCL)<br>(µg/ml) | Statistic summary                                          |
|---------------------------|----------|----------------------------|------------------------|------------------------------------------|------------------------------------------|------------------------------------------------------------|
| Control                   | 75       | 0.0 ± 0.0a                 | Y = 0.5161X - 6.7236   | 91.343<br>(74.861 – 110.929)             | 228.135<br>(174.962 – 354.875)           | <i>d. f.</i> = 5,<br><i>P</i> < 0.001,<br>$\chi^2$ = 5.140 |
| 25                        | 75       | 6.67 ± 1.33ab              |                        |                                          |                                          |                                                            |
| 50                        | 75       | 20.0 ± 4.0b                |                        |                                          |                                          |                                                            |
| 100                       | 75       | 42.67 ± 4.81c              |                        |                                          |                                          |                                                            |
| 150                       | 75       | 70.67 ± 3.53d              |                        |                                          |                                          |                                                            |
| 200                       | 75       | 97.33 ± 1.33e              |                        |                                          |                                          |                                                            |

See footnote Table 1.

**Table S3:** Larvicidal activity of columbamine fraction against the mosquito vector, *Culex pipiens*.

| Concentrations<br>(µg/ml) | <i>n</i> | Larval mortality<br>% ± SE | Regression<br>equation | LC <sub>50</sub><br>(LCL–UCL)<br>(µg/ml) | LC <sub>90</sub><br>(LCL–UCL)<br>(µg/ml) | Statistic summary                              |
|---------------------------|----------|----------------------------|------------------------|------------------------------------------|------------------------------------------|------------------------------------------------|
| Control                   | 75       | 0.0 ± 0.0a                 | $Y = 1.1267X - 23.867$ | 61.440<br>(53.260 – 70.980)              | 119.542<br>(97.470 – 171.995)            | $d.f.= 5,$<br>$P < 0.001,$<br>$\chi^2 = 6.860$ |
| 20                        | 75       | 5.33 ± 2.67ab              |                        |                                          |                                          |                                                |
| 40                        | 75       | 18.67 ± 3.51b              |                        |                                          |                                          |                                                |
| 60                        | 75       | 34.67 ± 3.51c              |                        |                                          |                                          |                                                |
| 80                        | 75       | 65.33 ± 4.81d              |                        |                                          |                                          |                                                |
| 100                       | 75       | 94.67 ± 1.33e              |                        |                                          |                                          |                                                |

See footnote Table 1.

**Table S4:** Larvicidal activity of *Beta*-sitosterol fraction against the mosquito vector, *Culex pipiens*.

| Concentrations<br>(µg/ml) | <i>n</i> | Larval mortality<br>% ± SE | Regression<br>equation | LC <sub>50</sub><br>(LCL–UCL)<br>(µg/ml) | LC <sub>90</sub><br>(LCL–UCL)<br>(µg/ml) | Statistic summary                                          |
|---------------------------|----------|----------------------------|------------------------|------------------------------------------|------------------------------------------|------------------------------------------------------------|
| Control                   | 75       | 0.0 ± 0.0a                 | Y = 0.456X - 14.267    | 123.236<br>(52.365 – 210.466)            | 254.709<br>(166.189 – 4711.963)          | <i>d. f.</i> = 5,<br><i>P</i> < 0.001,<br>$\chi^2$ = 8.006 |
| 50                        | 75       | 12.0 ± 0.0b                |                        |                                          |                                          |                                                            |
| 100                       | 75       | 29.33 ± 2.67c              |                        |                                          |                                          |                                                            |
| 150                       | 75       | 48.0 ± 2.31d               |                        |                                          |                                          |                                                            |
| 200                       | 75       | 81.33 ± 1.33e              |                        |                                          |                                          |                                                            |
| 250                       | 75       | 100.0 ± 0.0f               |                        |                                          |                                          |                                                            |

See footnote Table 1.

**Table S5:** Larvicidal activity of the methanolic extract of *Annickia chlorantha* against the mosquito vector, *Culex pipiens*.

| Concentrations (µg/ml) | <i>n</i> | Larval mortality % ± SE | Regression equation  | LC <sub>50</sub> (LCL–UCL) (µg/ml) | LC <sub>90</sub> (LCL–UCL) (µg/ml) | Statistic summary                                           |
|------------------------|----------|-------------------------|----------------------|------------------------------------|------------------------------------|-------------------------------------------------------------|
| Control                | 75       | 0.0 ± 0.0a              | Y = 0.2499X - 1.0163 | 162.630<br>(144.472 – 182.347)     | 433.95<br>(365.123 – 546.16)       | <i>d. f.</i> = 5,<br><i>P</i> < 0.001,<br>$\chi^2$ = 19.459 |
| 50                     | 75       | 9.33± 2.67b             |                      |                                    |                                    |                                                             |
| 100                    | 75       | 28.0 ± 2.31c            |                      |                                    |                                    |                                                             |
| 200                    | 75       | 45.33 ± 3.53d           |                      |                                    |                                    |                                                             |
| 300                    | 75       | 77.34 ± 3.53e           |                      |                                    |                                    |                                                             |
| 400                    | 75       | 97.33 ± 1.33f           |                      |                                    |                                    |                                                             |

See footnote Table 1.
